# Supplementary material for: PM10 Element Distribution and Environmental-Sanitary Risk Analysis in Two Italian Industrial Cities
Source: MDPI journal article supplement (doi:10.3390/atmos14010048), 2022-12-27
Supplement: s1 [file s1]

## Supplementary Materials:

### PM<sub>10</sub> Element Distribution and Environmental-Sanitary Risk Analysis in Two Italian Industrial Cities

Aleandro Diana <sup>1</sup>, Stefano Bertinetti <sup>1,\*</sup>, Ornella Abollino <sup>2</sup>, Agnese Giacomino <sup>2</sup>, Sandro Buoso <sup>1</sup>, Laura Favilli <sup>2</sup>, Paolo Inaudi <sup>2</sup> and Mery Malandrino <sup>1,\*</sup>

<sup>1</sup> Department of Chemistry, University of Turin, 10125 Turin, Italy

<sup>2</sup> Department of Drug Science and Technology, University of Turin, 10125 Turin, Italy

\* Correspondence: stefano.bertinetti@unito.it (S.B.); mery.malandrino@unito.it (M.M.)

**Table S1.** Instrumental technique used and principal information regarding the method of analysis, and the recovery obtained during the validation of the analytical method using the certified materials NIST SRM 1649a and BCR 176.

| Element | Instrumental Technique | Isotope/Wavelength | Resolution | Internal standard | Recovery (%) |
|---------|------------------------|--------------------|------------|-------------------|--------------|
| Ba      | ICP-MS                 | 135/137/138        | LR         | Te 128            | 89.6         |
| Cd      | ICP-MS                 | 113                | MR         | Te 125            | 101.2        |
| Co      | ICP-MS                 | 59                 | LR         | Te 128            | 79.5         |
| Cr      | ICP-MS                 | 52                 | MR         | Te 125            | 51.7         |
| Cu      | ICP-MS                 | 65                 | MR         | Te 128            | 89.9         |
| Fe      | ICP-AES                | 259.939 nm         |            |                   | 86.3         |
| Hg      | ICP-MS                 | 199/200/201        | LR         | Te 125            | 90.9         |
| K       | ICP-AES                | 769.896 nm         |            |                   | 116.0        |
| Mn      | ICP-MS                 | 55                 | MR         | Te 125            | 77.6         |
| Mo      | ICP-MS                 | 95/96              | LR         | Te 128            | -            |
| Ni      | ICP-MS                 | 58                 | LR         | /                 | 96.3         |
| Pb      | ICP-MS                 | 206                | LR         | Te 125            | 100.9        |
| Si      | ICP-MS                 | 28                 | MR         | Te 125            | -            |
| Ti      | ICP-AES                | 334.940 nm         |            |                   | 72.5         |
| V       | ICP-MS                 | 51                 | MR         | Te 128            | 86.4         |
| Zn      | ICP-MS                 | 64/66              | MR         | Te 128            | 94.6         |
| Zr      | ICP-MS                 | 90/91              | MR         | Te 125            | -            |

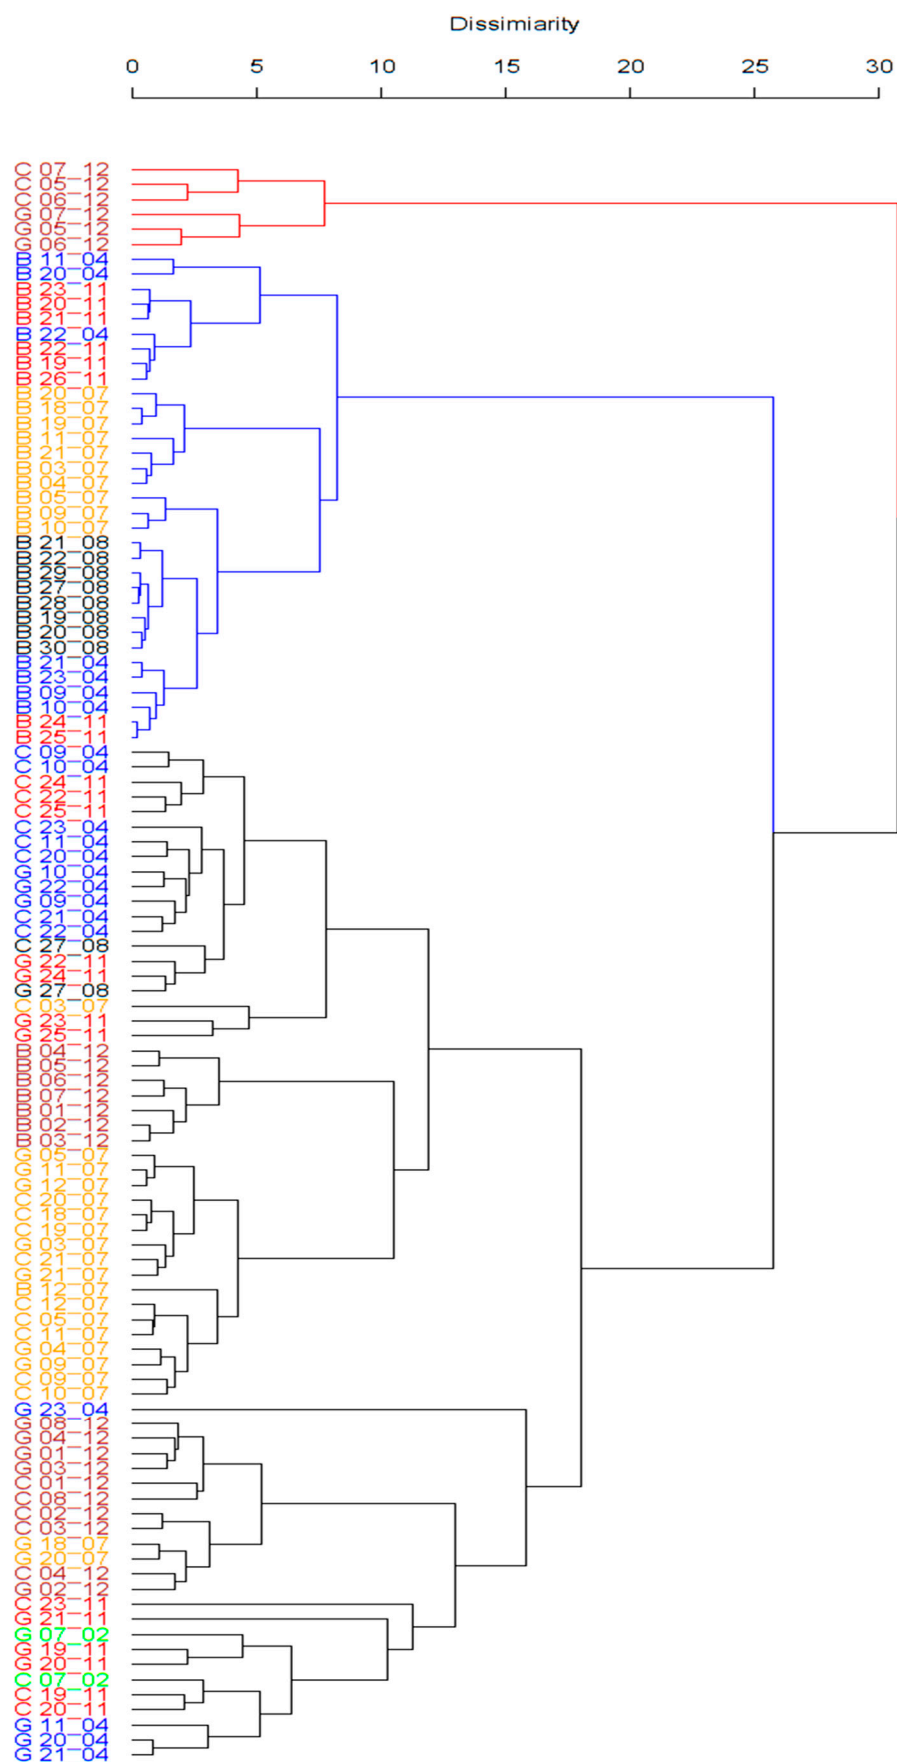

**Figure S1.** Dendrogram for the HCA of the PM<sub>10</sub> samples (R-mode). The labels of the samples report the site of sampling (B for Biella, C for Consolata and G for Grassi) and are coloured as a function of the month: August (black), November (red), December (grenade), February (green), April (blue) and July (yellow).

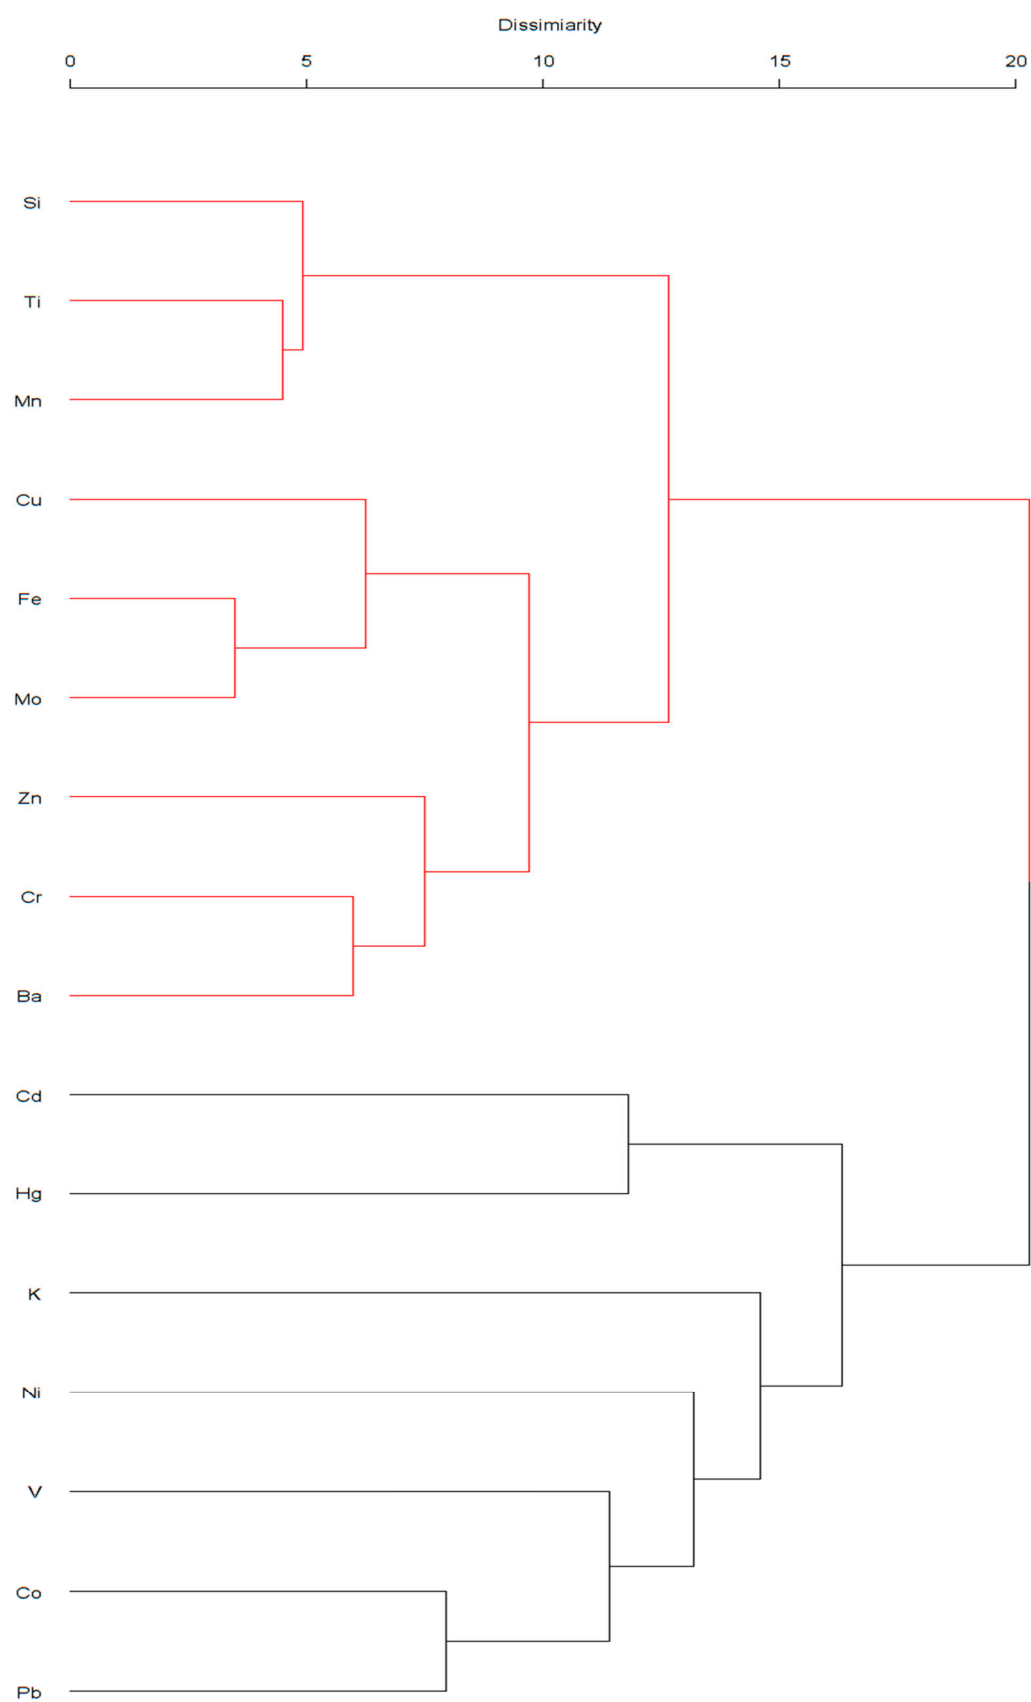

**Figure S2.** Dendrogram for HCA of the PM<sub>10</sub> samples for the variables (Q-mode). The data are expressed as metals mass amounts per unit of mass of PM<sub>10</sub> (mg g<sup>-1</sup>).

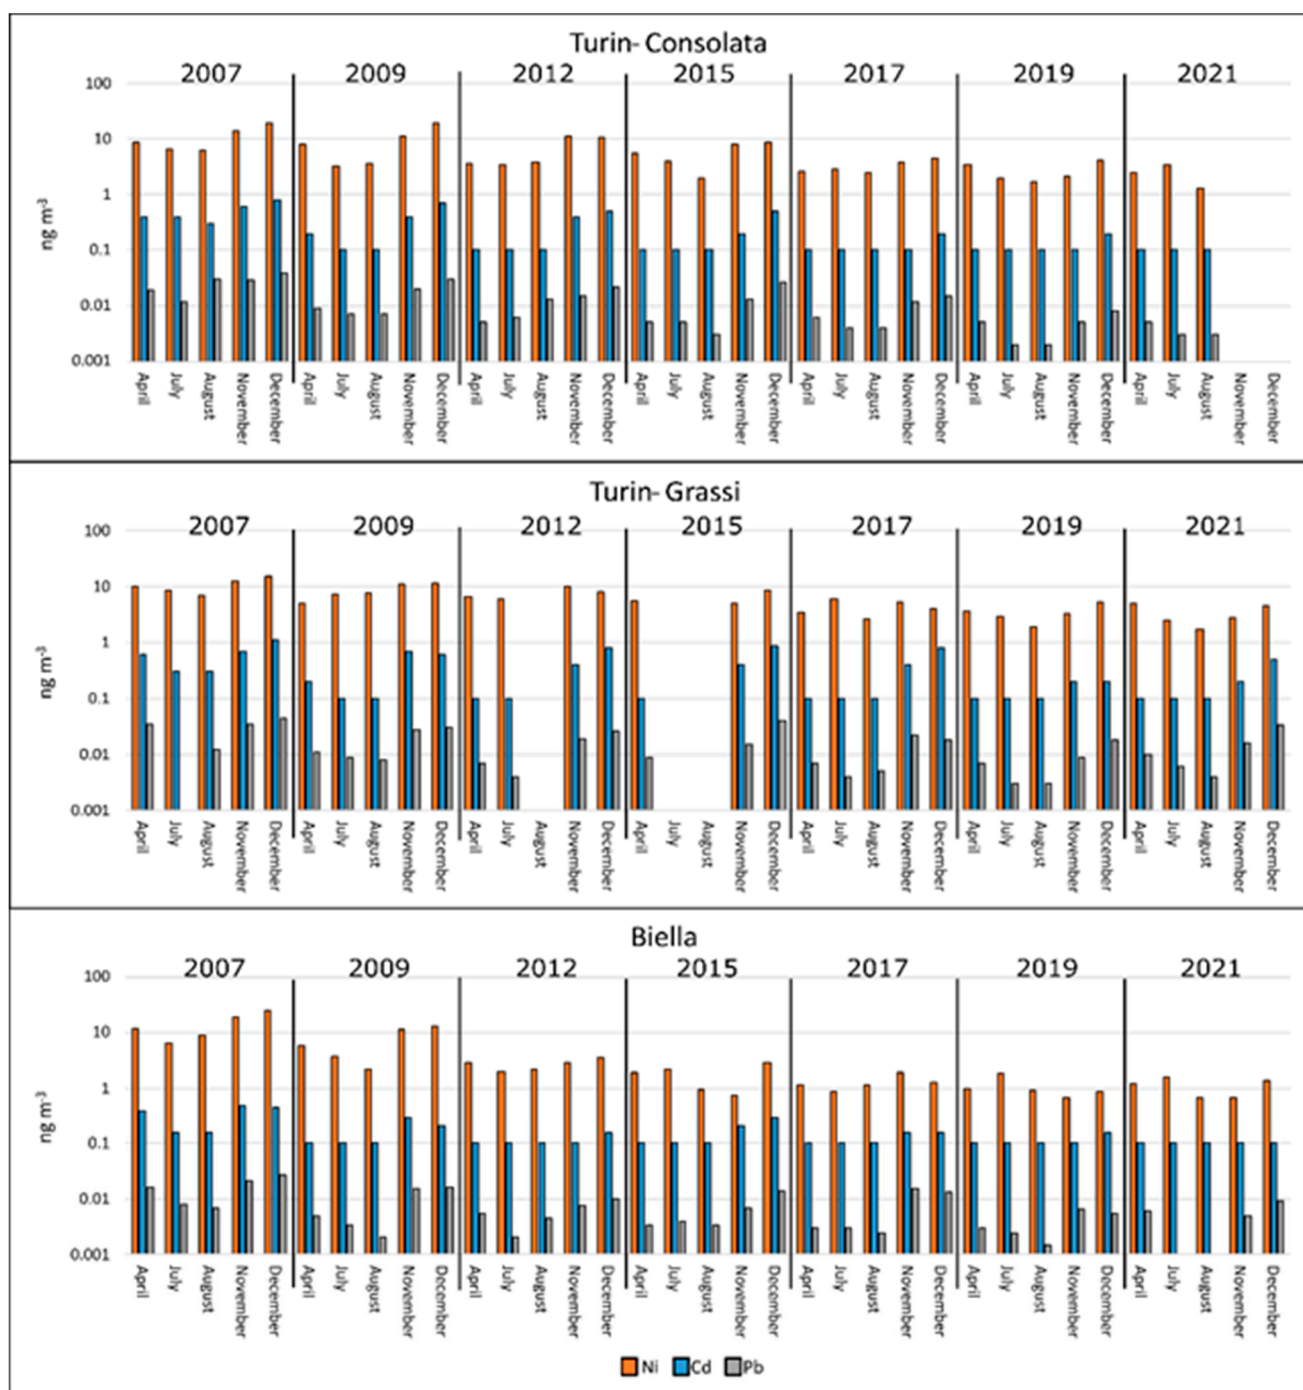

**Figure S3.** The trends of Ni, Cd, and Pb concentrations in PM10 from Turin (Consolata, Grassi) and Biella from 2007 to 2021. The data have been provided by ARPA Piedmont (<https://aria.ambiente.piemonte.it/#/qualita-aria/dati>).
